# Supplementary material for: Potential Impacts of Different Occupational Outdoor Heat Exposure Thresholds among Washington State Crop and Construction Workers and Implications for Other Jurisdictions
Source: MDPI journal article supplement (doi:10.3390/ijerph191811583), 2022-09-14
Supplement: s1 [file s1]

## SUPPLEMENTAL MATERIAL

**Table S1. Annual average number of PRISM derived temperature threshold exceedances, May-September, 2011-2020**

| County              | 80°F (26.7°C) | 85°F (29.4°C) | 89°F (31.7°C) | 90°F (32.2°C) | 95°F (35.0°C) |
|---------------------|---------------|---------------|---------------|---------------|---------------|
| <b>Benton</b>       | 92.6          | 64.0          | 42.8          | 37.8          | 16.7          |
| <b>Franklin</b>     | 91.4          | 63.7          | 41.2          | 35.7          | 15.9          |
| <b>Walla Walla</b>  | 86.8          | 60.7          | 39.5          | 34.3          | 14.4          |
| <b>Grant</b>        | 83.9          | 56.2          | 35.0          | 30.0          | 12.7          |
| <b>Adams</b>        | 80.5          | 53.8          | 32.5          | 29.1          | 12.5          |
| <b>Whitman</b>      | 70.5          | 48.0          | 29.2          | 25.0          | 10.0          |
| <b>Lincoln</b>      | 69.7          | 43.0          | 25.9          | 22.9          | 7.3           |
| <b>Douglas</b>      | 68.2          | 41.8          | 25.5          | 21.3          | 6.7           |
| <b>Spokane</b>      | 63.6          | 38.5          | 22.4          | 19.5          | 4.7           |
| <b>Asotin</b>       | 63.4          | 41.9          | 23.8          | 20.8          | 5.0           |
| <b>Garfield</b>     | 63.0          | 40.2          | 23.0          | 19.2          | 5.0           |
| <b>Klickitat</b>    | 60.4          | 34.4          | 20.2          | 17.2          | 5.1           |
| <b>Columbia</b>     | 59.3          | 34.4          | 19.2          | 16.2          | 3.7           |
| <b>Stevens</b>      | 58.1          | 34.7          | 18.7          | 15.2          | 3.4           |
| <b>Ferry</b>        | 48.6          | 25.6          | 11.6          | 8.6           | 1.3           |
| <b>Yakima</b>       | 47.3          | 23.6          | 11.2          | 8.5           | 0.6           |
| <b>Clark</b>        | 45.2          | 24.2          | 10.8          | 8.7           | 2.2           |
| <b>Pend Oreille</b> | 41.9          | 20.5          | 7.8           | 5.4           | 0.6           |
| <b>Thurston</b>     | 36.8          | 18.5          | 7.6           | 5.7           | 1.1           |
| <b>Kittitas</b>     | 34.7          | 15.8          | 5.8           | 4.6           | 0.1           |
| <b>Cowlitz</b>      | 34.1          | 15.3          | 6.8           | 5.5           | 0.7           |
| <b>Lewis</b>        | 33.3          | 14.7          | 6.2           | 5.0           | 0.6           |
| <b>Okanogan</b>     | 31.5          | 13.7          | 4.3           | 2.9           | 0.1           |
| <b>Mason</b>        | 27.2          | 11.1          | 4.0           | 2.8           | 0.2           |
| <b>Skamania</b>     | 26.8          | 11.3          | 3.5           | 3.0           | 0             |
| <b>Kitsap</b>       | 26.7          | 9.7           | 3.1           | 2.0           | 0.1           |
| <b>Chelan</b>       | 24.3          | 9.5           | 2.5           | 1.1           | 0             |
| <b>Wahkiakum</b>    | 20.1          | 8.1           | 3.8           | 2.7           | 0.4           |
| <b>King</b>         | 19.6          | 6.0           | 1.4           | 0.8           | 0             |

|                                              |      |      |      |      |     |
|----------------------------------------------|------|------|------|------|-----|
| <b>Pierce</b>                                | 18.9 | 5.7  | 1.3  | 0.8  | 0   |
| <b>Grays Harbor</b>                          | 16.2 | 6.2  | 2.3  | 1.6  | 0.1 |
| <b>Snohomish</b>                             | 15.9 | 4.3  | 0.4  | 0.2  | 0   |
| <b>Pacific</b>                               | 14.3 | 5.7  | 2.3  | 1.7  | 0.1 |
| <b>Skagit</b>                                | 13.3 | 2.6  | 0.1  | 0.1  | 0   |
| <b>Jefferson</b>                             | 10.0 | 2.6  | 0.4  | 0    | 0   |
| <b>Whatcom</b>                               | 10.0 | 1.4  | 0    | 0    | 0   |
| <b>Clallam</b>                               | 8.1  | 2.2  | 0    | 0    | 0   |
| <b>Island</b>                                | 5.2  | 0.3  | 0    | 0    | 0   |
| <b>San Juan</b>                              | 4.9  | 0.1  | 0    | 0    | 0   |
| <b>Median<br/>(All counties)</b>             | 34.7 | 15.8 | 6.8  | 5.4  | 0.6 |
| <b>Standard Deviation<br/>(All counties)</b> | 26.4 | 19.8 | 13.2 | 11.7 | 5.0 |

**Table S2. Annual average number of PRISM derived temperature threshold exceedances, October-April, 2011-2020**

| <b>County</b>      | <b>80°F (26.7°C)</b> | <b>85°F (29.4°C)</b> | <b>89°F (31.7°C)</b> | <b>90°F (32.2°C)</b> | <b>95°F (35.0°C)</b> |
|--------------------|----------------------|----------------------|----------------------|----------------------|----------------------|
| <b>Franklin</b>    | 2.1                  | 0.6                  | 0                    | 0                    | 0                    |
| <b>Benton</b>      | 2.0                  | 0.4                  | 0                    | 0                    | 0                    |
| <b>Walla Walla</b> | 1.6                  | 0.3                  | 0                    | 0                    | 0                    |
| <b>Grant</b>       | 1.5                  | 0.2                  | 0                    | 0                    | 0                    |
| <b>Clark</b>       | 1.4                  | 0.2                  | 0                    | 0                    | 0                    |
| <b>Adams</b>       | 1.3                  | 0.1                  | 0                    | 0                    | 0                    |
| <b>Whitman</b>     | 1.3                  | 0                    | 0                    | 0                    | 0                    |
| <b>Asotin</b>      | 0.8                  | 0.1                  | 0                    | 0                    | 0                    |
| <b>Lincoln</b>     | 0.8                  | 0                    | 0                    | 0                    | 0                    |
| <b>Garfield</b>    | 0.7                  | 0                    | 0                    | 0                    | 0                    |
| <b>Klickitat</b>   | 0.7                  | 0                    | 0                    | 0                    | 0                    |
| <b>Spokane</b>     | 0.7                  | 0                    | 0                    | 0                    | 0                    |
| <b>Columbia</b>    | 0.5                  | 0                    | 0                    | 0                    | 0                    |
| <b>Douglas</b>     | 0.5                  | 0                    | 0                    | 0                    | 0                    |

|                     |     |     |   |   |   |
|---------------------|-----|-----|---|---|---|
| <b>Thurston</b>     | 0.5 | 0.1 | 0 | 0 | 0 |
| <b>Wahkiakum</b>    | 0.5 | 0.2 | 0 | 0 | 0 |
| <b>Lewis</b>        | 0.4 | 0   | 0 | 0 | 0 |
| <b>Cowlitz</b>      | 0.3 | 0   | 0 | 0 | 0 |
| <b>Grays Harbor</b> | 0.3 | 0   | 0 | 0 | 0 |
| <b>Kitsap</b>       | 0.3 | 0.1 | 0 | 0 | 0 |
| <b>Mason</b>        | 0.3 | 0   | 0 | 0 | 0 |
| <b>Pacific</b>      | 0.3 | 0   | 0 | 0 | 0 |
| <b>Stevens</b>      | 0.3 | 0   | 0 | 0 | 0 |
| <b>Yakima</b>       | 0.2 | 0   | 0 | 0 | 0 |
| <b>King</b>         | 0.1 | 0   | 0 | 0 | 0 |
| <b>Pierce</b>       | 0.1 | 0   | 0 | 0 | 0 |
| <b>Chelan</b>       | 0   | 0   | 0 | 0 | 0 |
| <b>Clallam</b>      | 0   | 0   | 0 | 0 | 0 |
| <b>Ferry</b>        | 0   | 0   | 0 | 0 | 0 |
| <b>Island</b>       | 0   | 0   | 0 | 0 | 0 |
| <b>Jefferson</b>    | 0   | 0   | 0 | 0 | 0 |
| <b>Kittitas</b>     | 0   | 0   | 0 | 0 | 0 |
| <b>Okanogan</b>     | 0   | 0   | 0 | 0 | 0 |
| <b>Pend Oreille</b> | 0   | 0   | 0 | 0 | 0 |
| <b>San Juan</b>     | 0   | 0   | 0 | 0 | 0 |
| <b>Skagit</b>       | 0   | 0   | 0 | 0 | 0 |
| <b>Skamania</b>     | 0   | 0   | 0 | 0 | 0 |
| <b>Snohomish</b>    | 0   | 0   | 0 | 0 | 0 |
| <b>Whatcom</b>      | 0   | 0   | 0 | 0 | 0 |

**Table S3. Annual average monthly employment (BLS), May-September, 2011-2020**

| <b>County</b> | <b>Total</b> | <b>County</b>    | <b>Construction</b> | <b>County</b> | <b>Crop and crop support</b> |
|---------------|--------------|------------------|---------------------|---------------|------------------------------|
| <b>King</b>   | 62800        | <b>King</b>      | 62147               | <b>Yakima</b> | 33012                        |
| <b>Yakima</b> | 35228        | <b>Pierce</b>    | 18695               | <b>Chelan</b> | 12145                        |
| <b>Pierce</b> | 19011        | <b>Snohomish</b> | 17526               | <b>Grant</b>  | 10223                        |

|                     |       |                     |       |                     |      |
|---------------------|-------|---------------------|-------|---------------------|------|
| <b>Snohomish</b>    | 18228 | <b>Clark</b>        | 10642 | <b>Franklin</b>     | 7254 |
| <b>Chelan</b>       | 13232 | <b>Spokane</b>      | 9151  | <b>Benton</b>       | 6214 |
| <b>Grant</b>        | 11109 | <b>Whatcom</b>      | 3913  | <b>Okanogan</b>     | 6104 |
| <b>Clark</b>        | 10886 | <b>Benton</b>       | 3346  | <b>Douglas</b>      | 3508 |
| <b>Spokane</b>      | 10009 | <b>Thurston</b>     | 3299  | <b>Whatcom</b>      | 3127 |
| <b>Benton</b>       | 9560  | <b>Skagit</b>       | 2829  | <b>Adams</b>        | 2494 |
| <b>Franklin</b>     | 8201  | <b>Kitsap</b>       | 2801  | <b>Walla Walla</b>  | 2007 |
| <b>Whatcom</b>      | 7040  | <b>Yakima</b>       | 2216  | <b>Skagit</b>       | 1770 |
| <b>Okanogan</b>     | 6463  | <b>Chelan</b>       | 1087  | <b>Spokane</b>      | 858  |
| <b>Skagit</b>       | 4600  | <b>Cowlitz</b>      | 985   | <b>Snohomish</b>    | 702  |
| <b>Douglas</b>      | 3829  | <b>Franklin</b>     | 948   | <b>King</b>         | 653  |
| <b>Thurston</b>     | 3502  | <b>Grant</b>        | 886   | <b>Klickitat</b>    | 566  |
| <b>Kitsap</b>       | 2857  | <b>Lewis</b>        | 839   | <b>Whitman</b>      | 386  |
| <b>Adams</b>        | 2527  | <b>Clallam</b>      | 762   | <b>Pierce</b>       | 315  |
| <b>Walla Walla</b>  | 2357  | <b>Grays Harbor</b> | 679   | <b>Kittitas</b>     | 258  |
| <b>Cowlitz</b>      | 1159  | <b>Kittitas</b>     | 570   | <b>Clark</b>        | 244  |
| <b>Lewis</b>        | 1025  | <b>Island</b>       | 560   | <b>Thurston</b>     | 203  |
| <b>Kittitas</b>     | 828   | <b>San Juan</b>     | 539   | <b>Lincoln</b>      | 196  |
| <b>Clallam</b>      | 806   | <b>Okanogan</b>     | 360   | <b>Lewis</b>        | 186  |
| <b>Klickitat</b>    | 725   | <b>Walla Walla</b>  | 350   | <b>Cowlitz</b>      | 174  |
| <b>Grays Harbor</b> | 693   | <b>Mason</b>        | 322   | <b>Columbia</b>     | 107  |
| <b>Island</b>       | 564   | <b>Douglas</b>      | 320   | <b>Kitsap</b>       | 56   |
| <b>San Juan</b>     | 556   | <b>Jefferson</b>    | 315   | <b>Mason</b>        | 49   |
| <b>Whitman</b>      | 548   | <b>Asotin</b>       | 240   | <b>Garfield</b>     | 44   |
| <b>Mason</b>        | 371   | <b>Whitman</b>      | 162   | <b>Clallam</b>      | 44   |
| <b>Jefferson</b>    | 337   | <b>Klickitat</b>    | 159   | <b>Skamania</b>     | 38   |
| <b>Asotin</b>       | 263   | <b>Stevens</b>      | 139   | <b>Asotin</b>       | 23   |
| <b>Lincoln</b>      | 222   | <b>Pacific</b>      | 81    | <b>Jefferson</b>    | 22   |
| <b>Stevens</b>      | 140   | <b>Pend Oreille</b> | 50    | <b>San Juan</b>     | 17   |
| <b>Columbia</b>     | 116   | <b>Adams</b>        | 33    | <b>Grays Harbor</b> | 15   |
| <b>Pacific</b>      | 96    | <b>Lincoln</b>      | 26    | <b>Pacific</b>      | 15   |
| <b>Pend Oreille</b> | 61    | <b>Ferry</b>        | 12    | <b>Pend Oreille</b> | 10   |
| <b>Skamania</b>     | 50    | <b>Skamania</b>     | 12    | <b>Island</b>       | 4    |
| <b>Garfield</b>     | 44    | <b>Columbia</b>     | 8     | <b>Stevens</b>      | 1    |
| <b>Ferry</b>        | 12    | <b>Wahkiakum</b>    | 2     | <b>Ferry</b>        | 0    |
| <b>Wahkiakum</b>    | 2     | <b>Garfield</b>     | 0     | <b>Wahkiakum</b>    | 0    |

**Table S4. Total annual average employment-days of exposure to temperature threshold exceedances (PRISM), May-September, 2011-2020**

| County              | 80°F (26.7°C) | 85°F (29.4°C) | 89°F (31.7°C) | 90°F (32.2°C) | 95°F (35.0°C) |
|---------------------|---------------|---------------|---------------|---------------|---------------|
| <b>Yakima</b>       | 1737860       | 880572        | 416913        | 317429        | 23223         |
| <b>King</b>         | 1278498       | 399755        | 91851         | 55043         | 0             |
| <b>Grant</b>        | 962783        | 644216        | 406314        | 350473        | 151458        |
| <b>Benton</b>       | 904258        | 623112        | 415205        | 369120        | 163927        |
| <b>Franklin</b>     | 777633        | 542711        | 352319        | 306795        | 136583        |
| <b>Spokane</b>      | 645000        | 391171        | 225007        | 196537        | 47398         |
| <b>Clark</b>        | 504102        | 270157        | 123196        | 99751         | 25506         |
| <b>Chelan</b>       | 382273        | 151797        | 38587         | 16360         | 0             |
| <b>Pierce</b>       | 374505        | 115302        | 25607         | 16459         | 0             |
| <b>Snohomish</b>    | 308033        | 83814         | 7950          | 3832          | 0             |
| <b>Douglas</b>      | 285127        | 181276        | 114213        | 95525         | 31098         |
| <b>Okanogan</b>     | 235648        | 104830        | 31742         | 20967         | 754           |
| <b>Adams</b>        | 212679        | 142824        | 85864         | 77073         | 33388         |
| <b>Walla Walla</b>  | 205220        | 143925        | 92411         | 78800         | 31879         |
| <b>Thurston</b>     | 132553        | 67090         | 28121         | 20863         | 3868          |
| <b>Whatcom</b>      | 83464         | 11464         | 0             | 0             | 0             |
| <b>Kitsap</b>       | 77999         | 28903         | 9376          | 5892          | 350           |
| <b>Skagit</b>       | 67632         | 13117         | 560           | 560           | 0             |
| <b>Whitman</b>      | 42226         | 29163         | 17687         | 15174         | 6216          |
| <b>Klickitat</b>    | 40451         | 21776         | 12126         | 10241         | 2945          |
| <b>Cowlitz</b>      | 40015         | 18136         | 8148          | 6529          | 865           |
| <b>Lewis</b>        | 34787         | 15469         | 6680          | 5330          | 647           |
| <b>Kittitas</b>     | 31041         | 14473         | 5214          | 4172          | 94            |
| <b>Lincoln</b>      | 17050         | 10800         | 6534          | 5829          | 1807          |
| <b>Asotin</b>       | 16682         | 11195         | 6632          | 5854          | 1346          |
| <b>Grays Harbor</b> | 11327         | 4452          | 1649          | 1130          | 78            |
| <b>Mason</b>        | 10584         | 4432          | 1623          | 1126          | 66            |
| <b>Stevens</b>      | 8163          | 4894          | 2658          | 2154          | 490           |

|                     |      |      |      |      |     |
|---------------------|------|------|------|------|-----|
| <b>Columbia</b>     | 8024 | 4649 | 2604 | 2212 | 526 |
| <b>Clallam</b>      | 6803 | 1907 | 0    | 0    | 0   |
| <b>Garfield</b>     | 3749 | 2540 | 1474 | 1235 | 335 |
| <b>Jefferson</b>    | 3433 | 961  | 167  | 0    | 0   |
| <b>Island</b>       | 3001 | 192  | 0    | 0    | 0   |
| <b>San Juan</b>     | 2872 | 70   | 0    | 0    | 0   |
| <b>Pend Oreille</b> | 2666 | 1379 | 546  | 400  | 55  |
| <b>Pacific</b>      | 1452 | 593  | 238  | 172  | 10  |
| <b>Skamania</b>     | 1321 | 519  | 149  | 121  | 0   |
| <b>Ferry</b>        | 599  | 315  | 148  | 113  | 20  |
| <b>Wahkiakum</b>    | 30   | 9    | 3    | 2    | 1   |

**Table S5. Construction annual average employment-days of exposure to temperature threshold exceedances (PRISM), May-September, 2011-2020**

| <b>County</b>      | <b>80°F (26.7°C)</b> | <b>85°F (29.4°C)</b> | <b>89°F (31.7°C)</b> | <b>90°F (32.2°C)</b> | <b>95°F (35.0°C)</b> |
|--------------------|----------------------|----------------------|----------------------|----------------------|----------------------|
| <b>King</b>        | 1266123              | 396079               | 90977                | 54584                | 0                    |
| <b>Spokane</b>     | 591044               | 358649               | 206507               | 180159               | 43507                |
| <b>Clark</b>       | 493623               | 264619               | 120744               | 97701                | 24953                |
| <b>Pierce</b>      | 367850               | 113155               | 25181                | 16154                | 0                    |
| <b>Benton</b>      | 311118               | 214599               | 142880               | 126618               | 56090                |
| <b>Snohomish</b>   | 295987               | 80482                | 7634                 | 3675                 | 0                    |
| <b>Thurston</b>    | 125038               | 63354                | 26733                | 19790                | 3668                 |
| <b>Yakima</b>      | 106945               | 54396                | 26202                | 20003                | 1356                 |
| <b>Franklin</b>    | 86795                | 60344                | 38663                | 33307                | 14597                |
| <b>Kitsap</b>      | 76501                | 28309                | 9183                 | 5775                 | 334                  |
| <b>Grant</b>       | 75285                | 50475                | 31073                | 26621                | 11289                |
| <b>Whatcom</b>     | 40192                | 5796                 | 0                    | 0                    | 0                    |
| <b>Skagit</b>      | 39530                | 7780                 | 315                  | 315                  | 0                    |
| <b>Cowlitz</b>     | 34124                | 15363                | 7007                 | 5633                 | 753                  |
| <b>Walla Walla</b> | 31416                | 22408                | 14901                | 13051                | 5434                 |
| <b>Lewis</b>       | 28684                | 12883                | 5648                 | 4506                 | 534                  |
| <b>Chelan</b>      | 26861                | 10604                | 2885                 | 1362                 | 0                    |

|                     |       |       |      |      |      |
|---------------------|-------|-------|------|------|------|
| <b>Douglas</b>      | 22101 | 13509 | 8178 | 6820 | 2181 |
| <b>Kittitas</b>     | 20444 | 9423  | 3516 | 2819 | 58   |
| <b>Asotin</b>       | 15028 | 10078 | 5982 | 5285 | 1207 |
| <b>Whitman</b>      | 11883 | 7995  | 4792 | 4113 | 1679 |
| <b>Okanogan</b>     | 11630 | 5051  | 1596 | 1093 | 36   |
| <b>Grays Harbor</b> | 11116 | 4362  | 1612 | 1103 | 73   |
| <b>Klickitat</b>    | 9739  | 5546  | 3262 | 2774 | 818  |
| <b>Mason</b>        | 8969  | 3733  | 1350 | 935  | 62   |
| <b>Stevens</b>      | 8123  | 4872  | 2646 | 2146 | 490  |
| <b>Clallam</b>      | 6417  | 1775  | 0    | 0    | 0    |
| <b>Jefferson</b>    | 3207  | 878   | 148  | 0    | 0    |
| <b>Island</b>       | 2952  | 185   | 0    | 0    | 0    |
| <b>San Juan</b>     | 2773  | 68    | 0    | 0    | 0    |
| <b>Adams</b>        | 2672  | 1798  | 1060 | 957  | 424  |
| <b>Pend Oreille</b> | 2172  | 1117  | 453  | 340  | 46   |
| <b>Lincoln</b>      | 1751  | 1061  | 611  | 532  | 153  |
| <b>Pacific</b>      | 1213  | 499   | 212  | 153  | 10   |
| <b>Ferry</b>        | 599   | 315   | 148  | 113  | 20   |
| <b>Columbia</b>     | 596   | 231   | 108  | 79   | 29   |
| <b>Skamania</b>     | 360   | 165   | 57   | 49   | 0    |
| <b>Wahkiakum</b>    | 30    | 9     | 3    | 2    | 1    |
| <b>Garfield</b>     | 0     | 0     | 0    | 0    | 0    |

**Table S6. Crop and crop support annual average employment-days of exposure to temperature threshold exceedances (PRISM), May-September, 2011-2020**

| <b>County</b>   | <b>80°F (26.7°C)</b> | <b>85°F (29.4°C)</b> | <b>89°F (31.7°C)</b> | <b>90°F (32.2°C)</b> | <b>95°F (35.0°C)</b> |
|-----------------|----------------------|----------------------|----------------------|----------------------|----------------------|
| <b>Yakima</b>   | 1630916              | 826176               | 390711               | 297426               | 21868                |
| <b>Grant</b>    | 887498               | 593742               | 375241               | 323851               | 140169               |
| <b>Franklin</b> | 690838               | 482367               | 313656               | 273488               | 121986               |
| <b>Benton</b>   | 593140               | 408514               | 272324               | 242502               | 107837               |
| <b>Chelan</b>   | 355412               | 141193               | 35703                | 14998                | 0                    |
| <b>Douglas</b>  | 263026               | 167767               | 106034               | 88705                | 28917                |

|                     |        |        |       |       |       |
|---------------------|--------|--------|-------|-------|-------|
| <b>Okanogan</b>     | 224018 | 99779  | 30146 | 19874 | 718   |
| <b>Adams</b>        | 210007 | 141026 | 84804 | 76116 | 32964 |
| <b>Walla Walla</b>  | 173804 | 121517 | 77510 | 65749 | 26445 |
| <b>Spokane</b>      | 53957  | 32522  | 18501 | 16377 | 3892  |
| <b>Whatcom</b>      | 43272  | 5668   | 0     | 0     | 0     |
| <b>Klickitat</b>    | 30712  | 16230  | 8864  | 7467  | 2127  |
| <b>Whitman</b>      | 30344  | 21168  | 12896 | 11062 | 4537  |
| <b>Skagit</b>       | 28102  | 5337   | 245   | 245   | 0     |
| <b>Lincoln</b>      | 15299  | 9739   | 5923  | 5297  | 1653  |
| <b>King</b>         | 12375  | 3676   | 874   | 459   | 0     |
| <b>Snohomish</b>    | 12046  | 3331   | 317   | 157   | 0     |
| <b>Kittitas</b>     | 10598  | 5050   | 1698  | 1353  | 36    |
| <b>Clark</b>        | 10479  | 5538   | 2452  | 2050  | 554   |
| <b>Thurston</b>     | 7515   | 3736   | 1388  | 1073  | 200   |
| <b>Columbia</b>     | 7428   | 4418   | 2496  | 2133  | 498   |
| <b>Pierce</b>       | 6655   | 2147   | 426   | 305   | 0     |
| <b>Lewis</b>        | 6103   | 2586   | 1032  | 824   | 113   |
| <b>Cowlitz</b>      | 5891   | 2773   | 1141  | 896   | 111   |
| <b>Garfield</b>     | 3749   | 2540   | 1474  | 1235  | 335   |
| <b>Asotin</b>       | 1654   | 1117   | 650   | 570   | 139   |
| <b>Mason</b>        | 1616   | 699    | 273   | 192   | 4     |
| <b>Kitsap</b>       | 1497   | 594    | 193   | 117   | 16    |
| <b>Skamania</b>     | 961    | 355    | 91    | 72    | 0     |
| <b>Pend Oreille</b> | 493    | 263    | 94    | 60    | 9     |
| <b>Clallam</b>      | 385    | 132    | 0     | 0     | 0     |
| <b>Pacific</b>      | 239    | 94     | 26    | 19    | 0     |
| <b>Jefferson</b>    | 226    | 84     | 19    | 0     | 0     |
| <b>Grays Harbor</b> | 211    | 90     | 36    | 27    | 5     |
| <b>San Juan</b>     | 100    | 3      | 0     | 0     | 0     |
| <b>Island</b>       | 49     | 7      | 0     | 0     | 0     |
| <b>Stevens</b>      | 40     | 22     | 12    | 8     | 0     |
| <b>Ferry</b>        | 0      | 0      | 0     | 0     | 0     |
| <b>Wahkiakum</b>    | 0      | 0      | 0     | 0     | 0     |



**Table S7. Annual average number of AWN derived temperature threshold exceedances, May-September, 2011-2020**

| <b>County</b>       | <b>80°F (26.7°C)</b> | <b>85°F (29.4°C)</b> | <b>89°F (31.7°C)</b> | <b>90°F (32.2°C)</b> | <b>95°F (35.0°C)</b> |
|---------------------|----------------------|----------------------|----------------------|----------------------|----------------------|
| <b>Franklin</b>     | 102.5                | 74                   | 50.2                 | 43.4                 | 19.4                 |
| <b>Benton</b>       | 97.8                 | 70.2                 | 48.5                 | 42.4                 | 18.7                 |
| <b>Walla Walla</b>  | 97.6                 | 71.5                 | 49.5                 | 43.1                 | 18.9                 |
| <b>Okanogan</b>     | 96.2                 | 70.5                 | 47.5                 | 41.7                 | 18.5                 |
| <b>Klickitat</b>    | 96.0                 | 70.7                 | 46.5                 | 40.9                 | 18.9                 |
| <b>Yakima</b>       | 94.6                 | 67.7                 | 42.7                 | 37.3                 | 14.3                 |
| <b>Grant</b>        | 90.2                 | 62.4                 | 37.0                 | 32.0                 | 13.0                 |
| <b>Adams</b>        | 89.9                 | 63.8                 | 40.0                 | 35.3                 | 17.2                 |
| <b>Chelan</b>       | 88.5                 | 64.0                 | 41.8                 | 35.2                 | 15.4                 |
| <b>Douglas</b>      | 87.5                 | 62.8                 | 39.8                 | 34.6                 | 14.0                 |
| <b>Columbia</b>     | 77.1                 | 53.7                 | 32.9                 | 29.0                 | 11.8                 |
| <b>Whitman</b>      | 75.4                 | 49.7                 | 30.8                 | 26.5                 | 10.8                 |
| <b>Kittitas</b>     | 75.2                 | 48.6                 | 26.6                 | 23.4                 | 7.9                  |
| <b>Spokane</b>      | 70.4                 | 43.5                 | 25.5                 | 22.1                 | 5.7                  |
| <b>Lincoln</b>      | 68.3                 | 40.7                 | 24.7                 | 21.5                 | 6.4                  |
| <b>Skamania</b>     | 64.5                 | 36.4                 | 19.5                 | 17.2                 | 4.8                  |
| <b>Asotin</b>       | 61.8                 | 36.2                 | 20.5                 | 16.3                 | 2.8                  |
| <b>Clark</b>        | 61.1                 | 33.0                 | 16.7                 | 13.6                 | 3.9                  |
| <b>Stevens</b>      | 51.9                 | 35.9                 | 23.5                 | 20.2                 | 9.2                  |
| <b>Thurston</b>     | 49.7                 | 26.7                 | 13.3                 | 10.4                 | 2.3                  |
| <b>Pierce</b>       | 46.2                 | 22.2                 | 7.9                  | 6.1                  | 0.9                  |
| <b>King</b>         | 44.8                 | 20.4                 | 8.2                  | 6.2                  | 0.3                  |
| <b>Whatcom</b>      | 36.0                 | 13.3                 | 4.8                  | 3.5                  | 0.2                  |
| <b>Kitsap</b>       | 32.3                 | 14.3                 | 5.0                  | 3.4                  | 0.2                  |
| <b>Ferry</b>        | 30.9                 | 21.2                 | 11.4                 | 9.3                  | 2.5                  |
| <b>Snohomish</b>    | 26.7                 | 8.6                  | 1.9                  | 0.7                  | 0.1                  |
| <b>Lewis</b>        | 25.6                 | 13.7                 | 7.2                  | 6.1                  | 1.7                  |
| <b>Grays Harbor</b> | 14.7                 | 6.4                  | 2.6                  | 1.9                  | 0.1                  |
| <b>Jefferson</b>    | 13.0                 | 5.4                  | 0.6                  | 0.2                  | 0                    |
| <b>Skagit</b>       | 13.0                 | 1.7                  | 0.3                  | 0.2                  | 0                    |

|                                                  |      |      |      |      |     |
|--------------------------------------------------|------|------|------|------|-----|
| <b>Clallam</b>                                   | 11.5 | 3.3  | 0.3  | 0.3  | 0   |
| <b>Island</b>                                    | 11.5 | 2.9  | 0.3  | 0.2  | 0   |
| <b>Pacific</b>                                   | 6.2  | 3.7  | 1.4  | 1.1  | 0.1 |
| <b>Garfield</b>                                  | 5.9  | 3.5  | 1.9  | 1.7  | 0.8 |
| <b>San Juan</b>                                  | 0    | 0    | 0    | 0    | 0   |
| <b>Mason</b>                                     | 0    | 0    | 0    | 0    | 0   |
| <b>Cowlitz</b>                                   | 0    | 0    | 0    | 0    | 0   |
| <b>Pend Oreille</b>                              | 0    | 0    | 0    | 0    | 0   |
| <b>Wahkiakum</b>                                 | 0    | 0    | 0    | 0    | 0   |
| <b>Median<br/>(All counties)</b>                 | 49.7 | 26.7 | 13.3 | 10.4 | 2.5 |
| <b>Standard<br/>Deviation<br/>(All counties)</b> | 35.6 | 26.6 | 18.0 | 15.8 | 7.1 |

**Table S8. Annual average number of AWN derived temperature threshold exceedances, October-April, 2011-2020**

| <b>County</b>      | <b>80°F<br/>(26.7°C)</b> | <b>85°F (29.4°C)</b> | <b>89°F (31.7°C)</b> | <b>90°F (32.2°C)</b> | <b>95°F (35.0°C)</b> |
|--------------------|--------------------------|----------------------|----------------------|----------------------|----------------------|
| <b>Klickitat</b>   | 1.4                      | 0.3                  | 0                    | 0                    | 0                    |
| <b>Benton</b>      | 1.1                      | 0.3                  | 0                    | 0                    | 0                    |
| <b>Yakima</b>      | 1.1                      | 0.1                  | 0                    | 0                    | 0                    |
| <b>Walla Walla</b> | 1.0                      | 0.3                  | 0                    | 0                    | 0                    |
| <b>Franklin</b>    | 0.9                      | 0.2                  | 0                    | 0                    | 0                    |
| <b>Skamania</b>    | 0.9                      | 0.1                  | 0                    | 0                    | 0                    |
| <b>Kittitas</b>    | 0.8                      | 0.1                  | 0                    | 0                    | 0                    |
| <b>Adams</b>       | 0.7                      | 0.0                  | 0                    | 0                    | 0                    |
| <b>Clark</b>       | 0.7                      | 0.0                  | 0                    | 0                    | 0                    |
| <b>Chelan</b>      | 0.6                      | 0.1                  | 0                    | 0                    | 0                    |
| <b>Grant</b>       | 0.6                      | 0.1                  | 0                    | 0                    | 0                    |
| <b>Whitman</b>     | 0.6                      | 0.0                  | 0                    | 0                    | 0                    |
| <b>Douglas</b>     | 0.4                      | 0.1                  | 0                    | 0                    | 0                    |

|                     |     |     |   |   |   |
|---------------------|-----|-----|---|---|---|
| <b>Columbia</b>     | 0.4 | 0.0 | 0 | 0 | 0 |
| <b>Okanogan</b>     | 0.4 | 0.0 | 0 | 0 | 0 |
| <b>Pacific</b>      | 0.3 | 0.0 | 0 | 0 | 0 |
| <b>Grays Harbor</b> | 0.2 | 0.0 | 0 | 0 | 0 |
| <b>Spokane</b>      | 0.2 | 0.0 | 0 | 0 | 0 |
| <b>Asotin</b>       | 0.1 | 0.0 | 0 | 0 | 0 |
| <b>Lincoln</b>      | 0.1 | 0.0 | 0 | 0 | 0 |
| <b>Stevens</b>      | 0.1 | 0.0 | 0 | 0 | 0 |
| <b>Clallam</b>      | 0   | 0.0 | 0 | 0 | 0 |
| <b>Ferry</b>        | 0   | 0.0 | 0 | 0 | 0 |
| <b>Garfield</b>     | 0   | 0.0 | 0 | 0 | 0 |
| <b>Island</b>       | 0   | 0.0 | 0 | 0 | 0 |
| <b>Jefferson</b>    | 0   | 0.0 | 0 | 0 | 0 |
| <b>King</b>         | 0   | 0.0 | 0 | 0 | 0 |
| <b>Kitsap</b>       | 0   | 0.0 | 0 | 0 | 0 |
| <b>Lewis</b>        | 0   | 0.0 | 0 | 0 | 0 |
| <b>Pierce</b>       | 0   | 0.0 | 0 | 0 | 0 |
| <b>Skagit</b>       | 0   | 0.0 | 0 | 0 | 0 |
| <b>Snohomish</b>    | 0   | 0.0 | 0 | 0 | 0 |
| <b>Thurston</b>     | 0   | 0.0 | 0 | 0 | 0 |
| <b>Whatcom</b>      | 0   | 0.0 | 0 | 0 | 0 |
| <b>San Juan</b>     | 0   | 0.0 | 0 | 0 | 0 |
| <b>Mason</b>        | 0   | 0.0 | 0 | 0 | 0 |
| <b>Cowlitz</b>      | 0   | 0.0 | 0 | 0 | 0 |
| <b>Pend Oreille</b> | 0   | 0.0 | 0 | 0 | 0 |
| <b>Wahkiakum</b>    | 0   | 0.0 | 0 | 0 | 0 |

**Table S9. Annual average total employment-days affected by AWN-derived heat wave days for crop and crop support by county from May-Sept, 2011-2020**

| <b>County</b> | <b>Employment-days at risk</b> |
|---------------|--------------------------------|
| <b>Yakima</b> | 254025                         |
| <b>Chelan</b> | 111781                         |
| <b>Grant</b>  | 85879                          |

|                     |       |
|---------------------|-------|
| <b>Benton</b>       | 68266 |
| <b>Franklin</b>     | 65490 |
| <b>Okanogan</b>     | 56432 |
| <b>Douglas</b>      | 29377 |
| <b>Adams</b>        | 27852 |
| <b>Whatcom</b>      | 23992 |
| <b>Walla Walla</b>  | 23439 |
| <b>Spokane</b>      | 7364  |
| <b>Klickitat</b>    | 6936  |
| <b>King</b>         | 5061  |
| <b>Whitman</b>      | 4312  |
| <b>Snohomish</b>    | 3516  |
| <b>Skagit</b>       | 3436  |
| <b>Clark</b>        | 3047  |
| <b>Kittitas</b>     | 2769  |
| <b>Pierce</b>       | 2224  |
| <b>Thurston</b>     | 1681  |
| <b>Lincoln</b>      | 1672  |
| <b>Columbia</b>     | 1175  |
| <b>Lewis</b>        | 672   |
| <b>Skamania</b>     | 495   |
| <b>Kitsap</b>       | 335   |
| <b>Clallam</b>      | 210   |
| <b>Asotin</b>       | 195   |
| <b>Grays Harbor</b> | 143   |
| <b>Jefferson</b>    | 95    |
| <b>Pacific</b>      | 73    |
| <b>Garfield</b>     | 23    |
| <b>Island</b>       | 19    |
| <b>Stevens</b>      | 7     |
| <b>Cowlitz</b>      | 0     |
| <b>Ferry</b>        | 0     |
| <b>Mason</b>        | 0     |

|                     |   |
|---------------------|---|
| <b>Pend Oreille</b> | 0 |
| <b>San Juan</b>     | 0 |
| <b>Wahkiakum</b>    | 0 |
